# Supplementary material
Source: publisher figshare collection journal article supplement (https://acs.figshare.com/ndownloader/files/4776058)
Supplement: Supplementary file 1 [file 4776058]

# Supplementary Information

*Rodrigo E. Palacios, Fu-Ren F. Fan, Allen J. Bard\*, and Paul F. Barbara\*.*

Department of Chemistry and Biochemistry and the Center for Nano- and Molecular Science and  
Technology, University of Texas, Austin, TX 78712, USA.

p.barbara@mail.utexas.edu

## RECEIVED DATE

**Materials.** F8BT (MW=100 kg/mol) was synthesized by CDT Ltd., and obtained as a gift. Polystyrene (MW=240 kg/mol), acetonitrile (HPLC grade, used without further purification), and lithium perchlorate ( $\text{LiClO}_4$ ) were purchased from Sigma-Aldrich. ITO coated cover slips were purchased from Metavac. Custom-made silicone spacers were purchased from Grace Bio-Labs, Inc. Silver wire (25  $\mu\text{m}$ ) was purchased from Alfa Products. Silver paint was purchased from Acme Chemicals and Insulation Co.

**Sample preparation and cell configuration.** Figure 1 shows the spectro-electrochemical cell components and assembly. The working electrode (WE) was prepared by spin-casting toluene solutions of ~1 nM in F8BT and 0.09% (w/w) in polystyrene on a previously cleaned ITO electrode form. The counter electrode (CE) was made by thermal evaporating consecutive thin layers of chromium (15 nm) and gold (~70 nm) over a glass cover slip using a custom-made mask. Two silicone spacers were used to hold the silver wire quasi-reference electrode (QRE) and to create a chamber between the working and reference electrodes which was filled with acetonitrile solution of 0.1 M in  $\text{LiClO}_4$ . Electrical connections to the three electrodes were made using silver paint and copper wires.

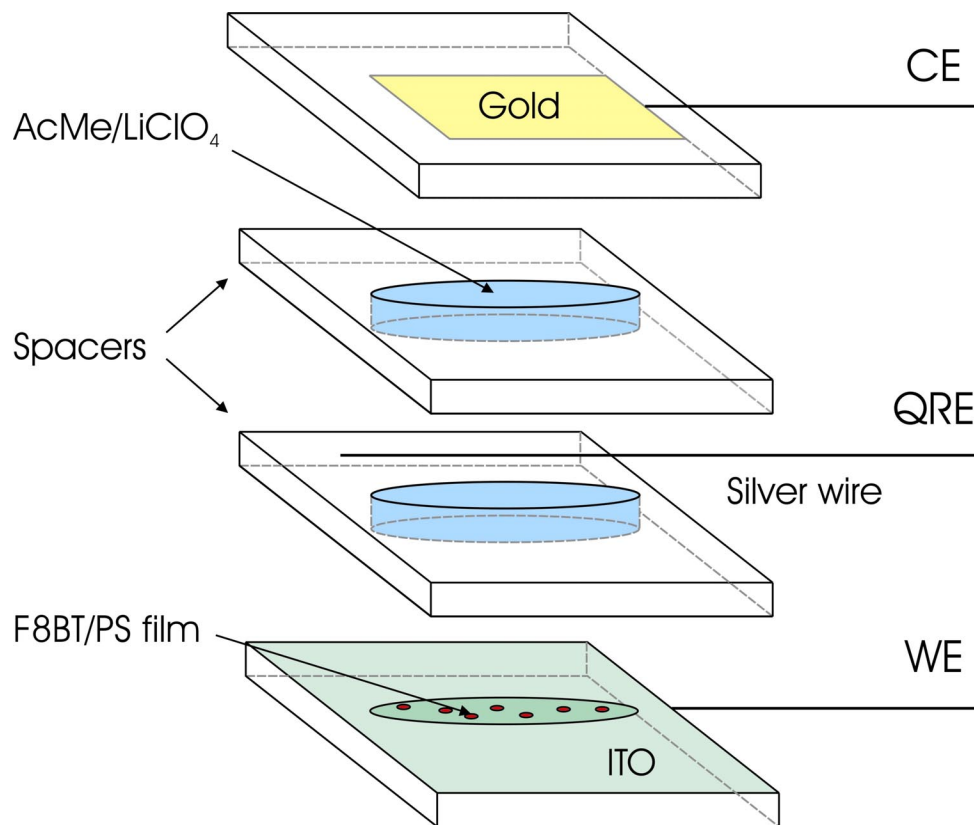

**Figure 1.** Spectro-electrochemical cell.
